# Supplementary material for: Spider Toxin SNX-482 Gating Modifier Spontaneously Partitions in the Membrane Guided by Electrostatic Interactions
Source: MDPI journal article supplement (doi:10.3390/membranes12060595), 2022-06-06
Supplement: s1 [file s1]

**Table S1.** Extrapolation simulated diffusion constants ( $D^{\text{sim}}$ ) to the infinite box size ( $D^{\infty}$ ) for different membrane compositions and different parameters for the Periodic Saffman-Delbrück model.

| Lipids          | Water viscosity $\eta_f$ (Poise) | Membrane viscosity $\eta_m$ (Poise cm) | Interleaflet coupling $b$ (Poise/cm) | $D^{\text{sim}}$ ( $\text{cm}^2/\text{s}$ ) | $D^{\infty}$ ( $\text{cm}^2/\text{s}$ ) <sup>1</sup> |
|-----------------|----------------------------------|----------------------------------------|--------------------------------------|---------------------------------------------|------------------------------------------------------|
| POPC            | 0.00311                          | $0.3 \times 10^{-7}$                   | $0.1 \times 10^7$                    | $1.5 \times 10^{-7}$                        | $5.1 \times 10^{-7}$                                 |
|                 | <b>0.00311</b>                   | <b><math>2.3 \times 10^{-7}</math></b> | <b><math>1.0 \times 10^7</math></b>  |                                             | <b><math>1.0 \times 10^{-7}</math></b>               |
|                 | 0.00311                          | $4.3 \times 10^{-7}$                   | $10 \times 10^7$                     |                                             | $0.6 \times 10^{-7}$                                 |
|                 | 0.0089                           | $0.3 \times 10^{-7}$                   | $0.1 \times 10^7$                    |                                             | $4.0 \times 10^{-7}$                                 |
|                 | 0.0089                           | $2.3 \times 10^{-7}$                   | $1.0 \times 10^7$                    |                                             | $0.9 \times 10^{-7}$                                 |
|                 | 0.0089                           | $4.3 \times 10^{-7}$                   | $10 \times 10^7$                     |                                             | $0.5 \times 10^{-7}$                                 |
| POPC:POPG (3:1) | 0.00311                          | $0.3 \times 10^{-7}$                   | $0.1 \times 10^7$                    | $1.6 \times 10^{-7}$                        | $5.2 \times 10^{-7}$                                 |
|                 | <b>0.00311</b>                   | <b><math>2.3 \times 10^{-7}</math></b> | <b><math>1.0 \times 10^7</math></b>  |                                             | <b><math>1.0 \times 10^{-7}</math></b>               |
|                 | 0.00311                          | $4.3 \times 10^{-7}$                   | $10 \times 10^7$                     |                                             | $0.6 \times 10^{-7}$                                 |
|                 | 0.0089                           | $0.3 \times 10^{-7}$                   | $0.1 \times 10^7$                    |                                             | $4.0 \times 10^{-7}$                                 |
|                 | 0.0089                           | $2.3 \times 10^{-7}$                   | $1.0 \times 10^7$                    |                                             | $0.9 \times 10^{-7}$                                 |
|                 | 0.0089                           | $4.3 \times 10^{-7}$                   | $10 \times 10^7$                     |                                             | $0.5 \times 10^{-7}$                                 |
| POPC:POPG (1:1) | 0.00311                          | $0.3 \times 10^{-7}$                   | $0.1 \times 10^7$                    | $1.3 \times 10^{-7}$                        | $5.0 \times 10^{-7}$                                 |
|                 | <b>0.00311</b>                   | <b><math>2.3 \times 10^{-7}</math></b> | <b><math>1.0 \times 10^7</math></b>  |                                             | <b><math>1.0 \times 10^{-7}</math></b>               |
|                 | 0.00311                          | $4.3 \times 10^{-7}$                   | $10 \times 10^7$                     |                                             | $0.6 \times 10^{-7}$                                 |
|                 | 0.0089                           | $0.3 \times 10^{-7}$                   | $0.1 \times 10^7$                    |                                             | $3.9 \times 10^{-7}$                                 |
|                 | 0.0089                           | $2.3 \times 10^{-7}$                   | $1.0 \times 10^7$                    |                                             | $0.9 \times 10^{-7}$                                 |
|                 | 0.0089                           | $4.3 \times 10^{-7}$                   | $10 \times 10^7$                     |                                             | $0.5 \times 10^{-7}$                                 |
| POPC:POPG (1:3) | 0.00311                          | $0.3 \times 10^{-7}$                   | $0.1 \times 10^7$                    | $1.5 \times 10^{-7}$                        | $5.1 \times 10^{-7}$                                 |
|                 | <b>0.00311</b>                   | <b><math>2.3 \times 10^{-7}</math></b> | <b><math>1.0 \times 10^7</math></b>  |                                             | <b><math>1.0 \times 10^{-7}</math></b>               |
|                 | 0.00311                          | $4.3 \times 10^{-7}$                   | $10 \times 10^7$                     |                                             | $0.6 \times 10^{-7}$                                 |
|                 | 0.0089                           | $0.3 \times 10^{-7}$                   | $0.1 \times 10^7$                    |                                             | $4.0 \times 10^{-7}$                                 |
|                 | 0.0089                           | $2.3 \times 10^{-7}$                   | $1.0 \times 10^7$                    |                                             | $0.9 \times 10^{-7}$                                 |
|                 | 0.0089                           | $4.3 \times 10^{-7}$                   | $10 \times 10^7$                     |                                             | $0.5 \times 10^{-7}$                                 |
| POPG            | 0.00311                          | $0.3 \times 10^{-7}$                   | $0.1 \times 10^7$                    | $1.4 \times 10^{-7}$                        | $5.1 \times 10^{-7}$                                 |
|                 | <b>0.00311</b>                   | <b><math>2.3 \times 10^{-7}</math></b> | <b><math>1.0 \times 10^7</math></b>  |                                             | <b><math>1.0 \times 10^{-7}</math></b>               |
|                 | 0.00311                          | $4.3 \times 10^{-7}$                   | $10 \times 10^7$                     |                                             | $0.6 \times 10^{-7}$                                 |
|                 | 0.0089                           | $0.3 \times 10^{-7}$                   | $0.1 \times 10^7$                    |                                             | $4.0 \times 10^{-7}$                                 |
|                 | 0.0089                           | $2.3 \times 10^{-7}$                   | $1.0 \times 10^7$                    |                                             | $0.9 \times 10^{-7}$                                 |
|                 | 0.0089                           | $4.3 \times 10^{-7}$                   | $10 \times 10^7$                     |                                             | $0.5 \times 10^{-7}$                                 |

Parameters used in the extrapolation a Water height \* H (nm) = 4, System lateral size L (nm) = 12 and Hydrodynamic radius R (nm) = 0.47<sup>1</sup>.

In bold, parameters and  $D^{\infty}$  reported in Table 3.

<sup>1</sup>. Venable, R.M.; Ingólfsson, H.I.; Lerner, M.G.; Perrin, B.S.; Camley, B.A.; Marrink, S.J.; Brown, F.L.H.; Pastor, R.W. Lipid and Peptide Diffusion in Bilayers: The Saffman-Delbrück Model and Periodic Boundary Conditions. *J. Phys. Chem. B* **2017**, *121*, 3443–3457, doi:10.1021/acs.jpcc.6b09111.

**Table S2.** Extrapolation of simulated diffusion constants ( $D^{\text{sim}}$ ) to the infinite box size ( $D^{\infty}$ ) for partitioned SNX-482 within POPC:POPG (3:1) and different parameters for the Periodic Saffman-Delbrück model.

| toxin-<br>membrane         | Water<br>height<br>(nm) | System<br>lateral<br>size<br>(nm) | Water viscosity<br>$\eta_f$ (Poise) | Membrane<br>viscosity $\eta_m$<br>(Poise cm) | Interleaflet<br>coupling $b$<br>(Poise/cm) | Hydrodyna<br>mic radius $R$<br>(nm) | $D^{\text{sim}}$<br>(cm <sup>2</sup> /s) | $D^{\infty}$<br>(cm <sup>2</sup> /s)    |
|----------------------------|-------------------------|-----------------------------------|-------------------------------------|----------------------------------------------|--------------------------------------------|-------------------------------------|------------------------------------------|-----------------------------------------|
| SNX-482 POPC:POPG<br>(3:1) | 6                       | 16                                | 0.00311                             | $0.3 \times 10^{-7}$                         | $0.1 \times 10^7$                          | 1.08                                | $4.1 \times 10^{-8}$                     | $2.96 \times 10^{-7}$                   |
|                            |                         |                                   | 0.00311                             | $2.3 \times 10^{-7}$                         | $1.0 \times 10^7$                          |                                     |                                          | $1.06 \times 10^{-7}$                   |
|                            |                         |                                   | 0.00311                             | $4.3 \times 10^{-7}$                         | $10 \times 10^7$                           |                                     |                                          | $0.66 \times 10^{-7}$                   |
|                            |                         |                                   | 0.0089                              | $0.3 \times 10^{-7}$                         | $0.1 \times 10^7$                          |                                     |                                          | <b><math>1.87 \times 10^{-7}</math></b> |
|                            |                         |                                   | 0.0089                              | $2.3 \times 10^{-7}$                         | $1.0 \times 10^7$                          |                                     |                                          | $0.89 \times 10^{-7}$                   |
|                            |                         |                                   | 0.0089                              | $4.3 \times 10^{-7}$                         | $10 \times 10^7$                           |                                     |                                          | $0.56 \times 10^{-7}$                   |

In bold, parameters and  $D^{\infty}$  reported in Table 3.

1. Venable, R.M.; Ingólfsson, H.I.; Lerner, M.G.; Perrin, B.S.; Camley, B.A.; Marrink, S.J.; Brown, F.L.H.; Pastor, R.W. Lipid and Peptide Diffusion in Bilayers: The Saffman–Delbrück Model and Periodic Boundary Conditions. *J. Phys. Chem. B* **2017**, *121*, 3443–3457, doi:10.1021/acs.jpcc.6b09111.

**Table S3.** Insertion Score (IS) of SNX-482 in lipid bilayers of different POPC/POPG ratios using the sidechain insertion criteria.

| Lipid composition | All-atom       |              |
|-------------------|----------------|--------------|
|                   | IS             | Bindings/Run |
| POPC              | $2.5 \pm 2.4$  | 1/4          |
| POPC:POPG (3:1)   | $13.3 \pm 2.2$ | 4/4          |
| POPC:POPG (1:1)   | $3.8 \pm 2.3$  | 2/4          |
| POPC:POPG (1:3)   | $4.2 \pm 2.9$  | 2/4          |
| POPG              | $0.93 \pm 0.6$ | 1/4          |

IS: insertion score, Bindings/Run: the ratio of simulations with at least one insertion event occurring while the membrane-toxin distance was less than 0.5 nm and sidechain residues are above of lipids heads.

**Table S4.** Membrane properties for all membrane compositions during the first 50ns of simulations

| Lipid composition | All-atom                          |                                     |
|-------------------|-----------------------------------|-------------------------------------|
|                   | Area per lipid ( $\text{\AA}^2$ ) | Membrane thickness ( $\text{\AA}$ ) |
| POPC              | $68.8 \pm 0.1$                    | $37.3 \pm 0.0$                      |
| POPC:POPG (3:1)   | $68.5 \pm 1.8$                    | $37.5 \pm 0.6$                      |
| POPC:POPG (1:1)   | $68.8 \pm 0.1$                    | $36.7 \pm 0.0$                      |
| POPC:POPG (1:3)   | $66.7 \pm 0.2$                    | $37.5 \pm 0.1$                      |
| POPG              | $66.2 \pm 0.2$                    | $37.7 \pm 0.1$                      |

**Table S5.** Average energy differences in kcal/mol between bound and unbound states for ion and water interactions with SNX-482 for the 3:1 and 1:0 systems.

| Component                          | Coulomb           | VdW            |
|------------------------------------|-------------------|----------------|
| $\Delta E(3:1)_{\text{toxin-wat}}$ | $436.2 \pm 18.1$  | $89.2 \pm 2.0$ |
| $\Delta E(3:1)_{\text{toxin-ion}}$ | $-459.8 \pm 27.9$ | $6.4 \pm 0.5$  |
| $\Delta E(1:0)_{\text{toxin-wat}}$ | $71.5 \pm 21.1$   | $66.2 \pm 1.9$ |
| $\Delta E(1:0)_{\text{toxin-ion}}$ | $-11.3 \pm 8.6$   | $0.1 \pm 0.1$  |

\* $\Delta E$ : Average energy differences between bound and unbound states in kcal/mol; toxin-wat and toxin-ion refer to the interaction energy between the SNX-482-ion and SNX-482-water pairs, respectively.

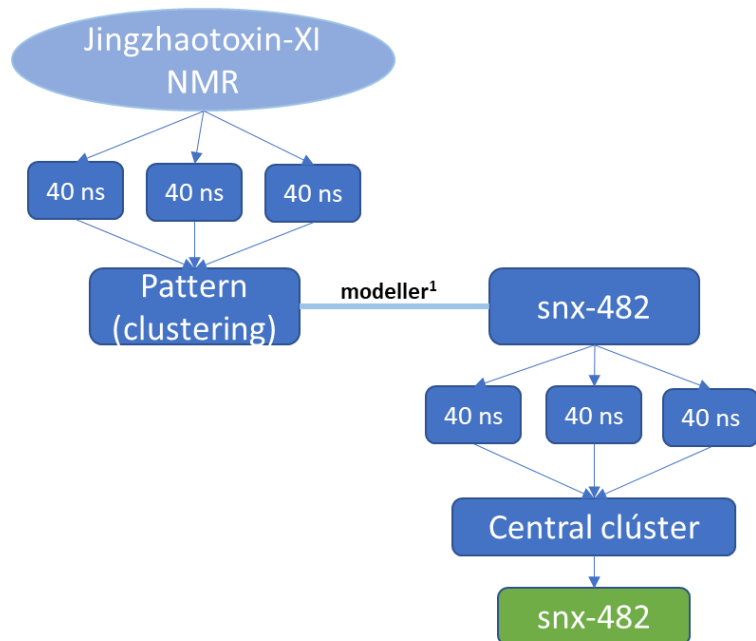

**Figure S1.** Comparative modeling scheme SNX-482. We randomly selected 3 PDB from Jingzhaotoxin-XI (Id: 2A2V) to perform independent 40 ns all-atom MD simulations. Afterward, we carried out comparative modeling with the central cluster of the simulations to produce 100 comparative models of SNX-482. We randomly selected 3 SNX-482 models and performed 40 ns all-atom MD simulations. The final SNX-482 comparative model corresponds to the central cluster of these simulations.

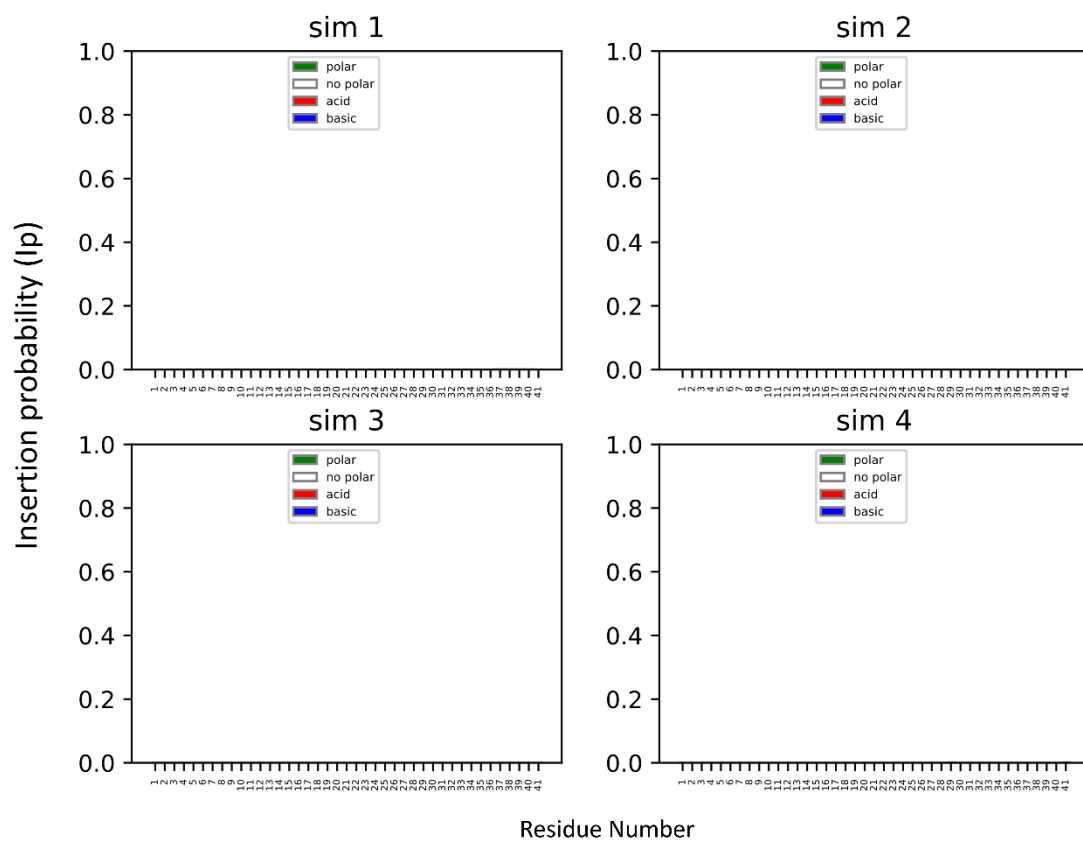

**Figure S2.** Insertions probability for each CG simulation of SNX-482 in pure POPC

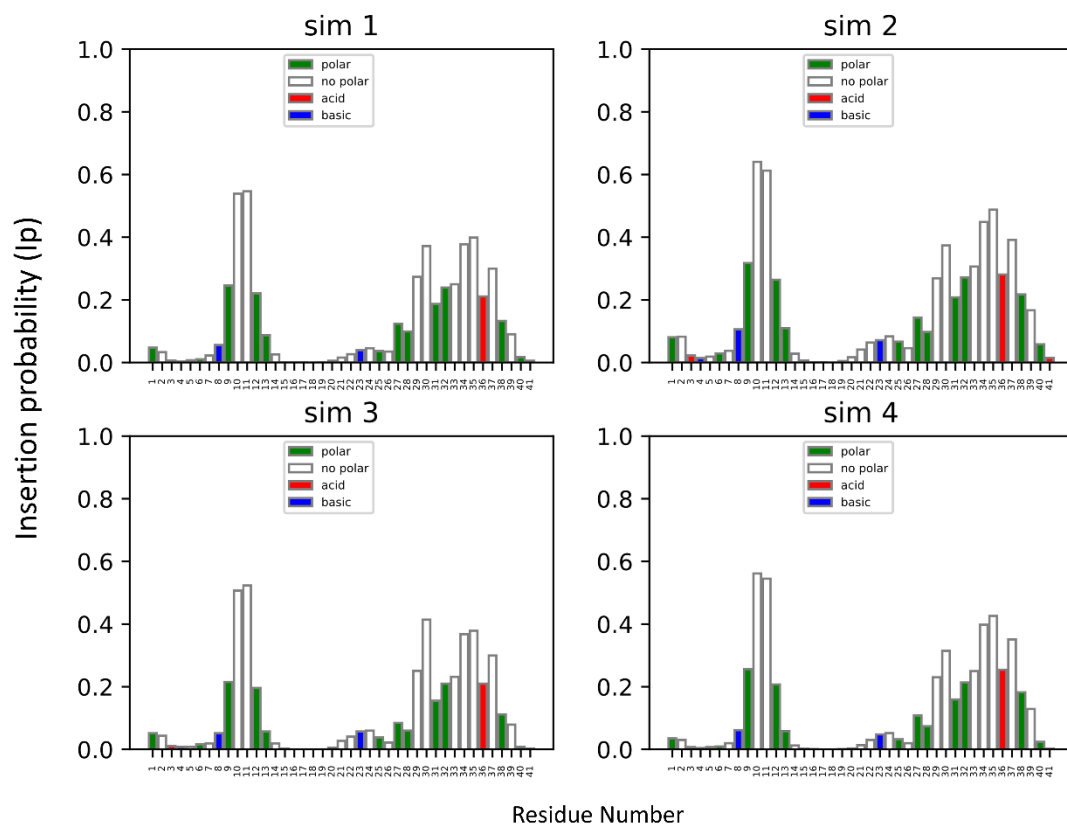

**Figure S3.** Insertions probability for each CG simulation of SNX-482 in POPC: POPG (3:1).

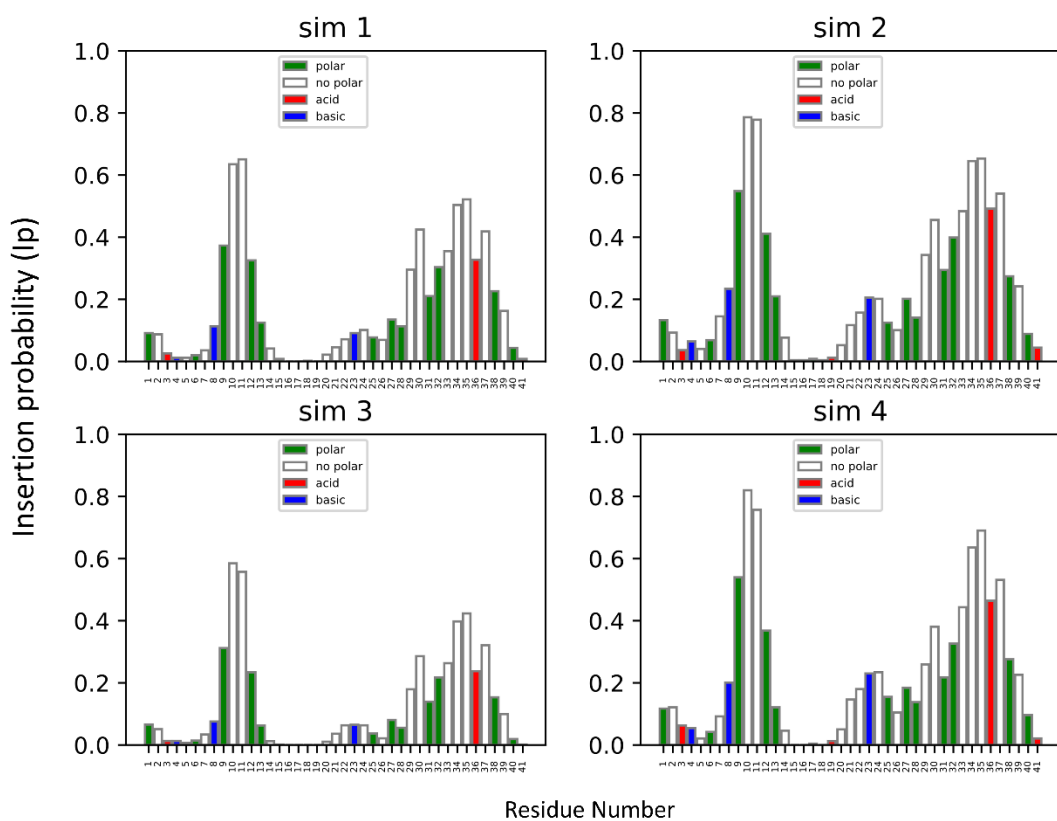

**Figure S4.** Insertions probability for each CG simulation of SNX-482 in POPC: POPG (1:1).

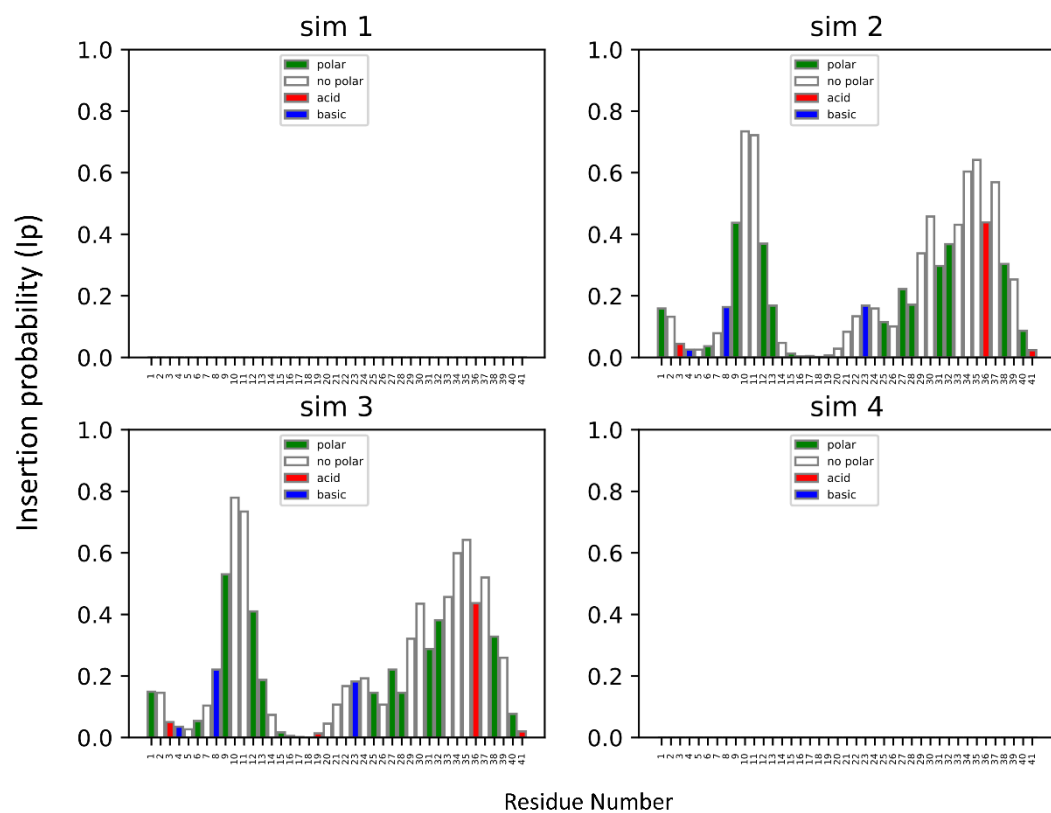

**Figure S5.** Insertions probability for each CG simulation of SNX-482 in POPC: POPG (1:3).



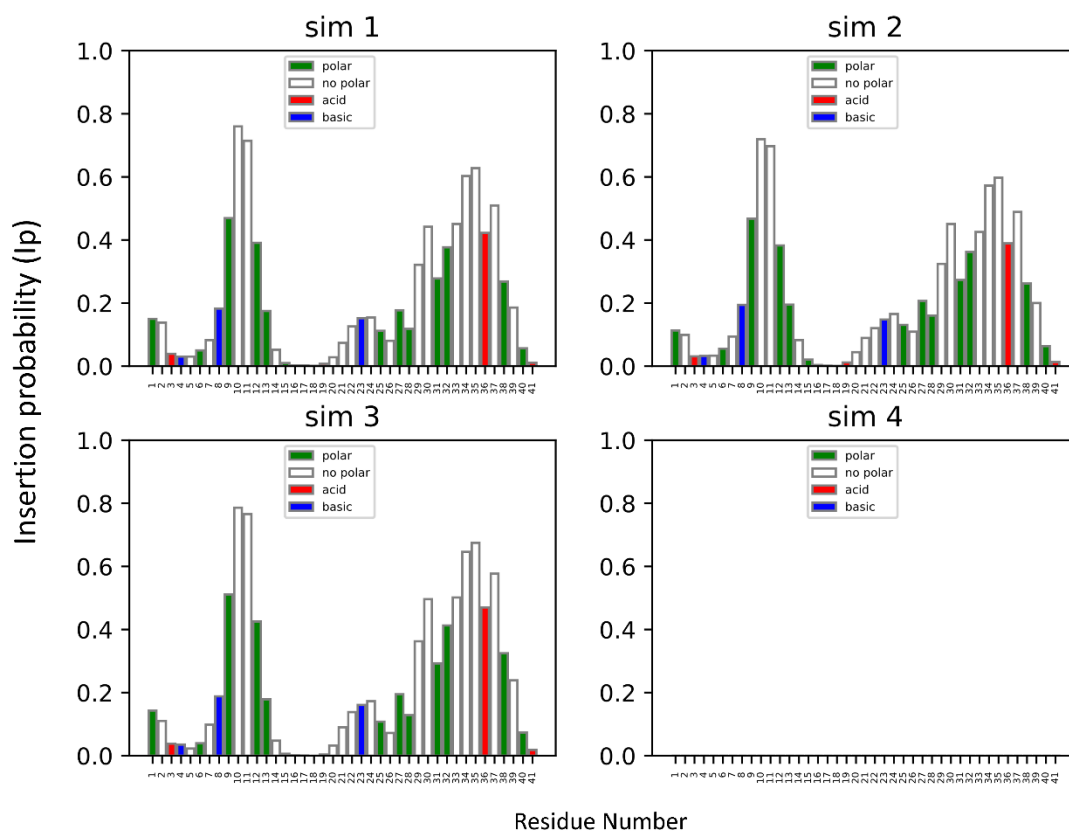

**Figure S6.** Insertions probability for each CG simulation of SNX-482 in pure POPG

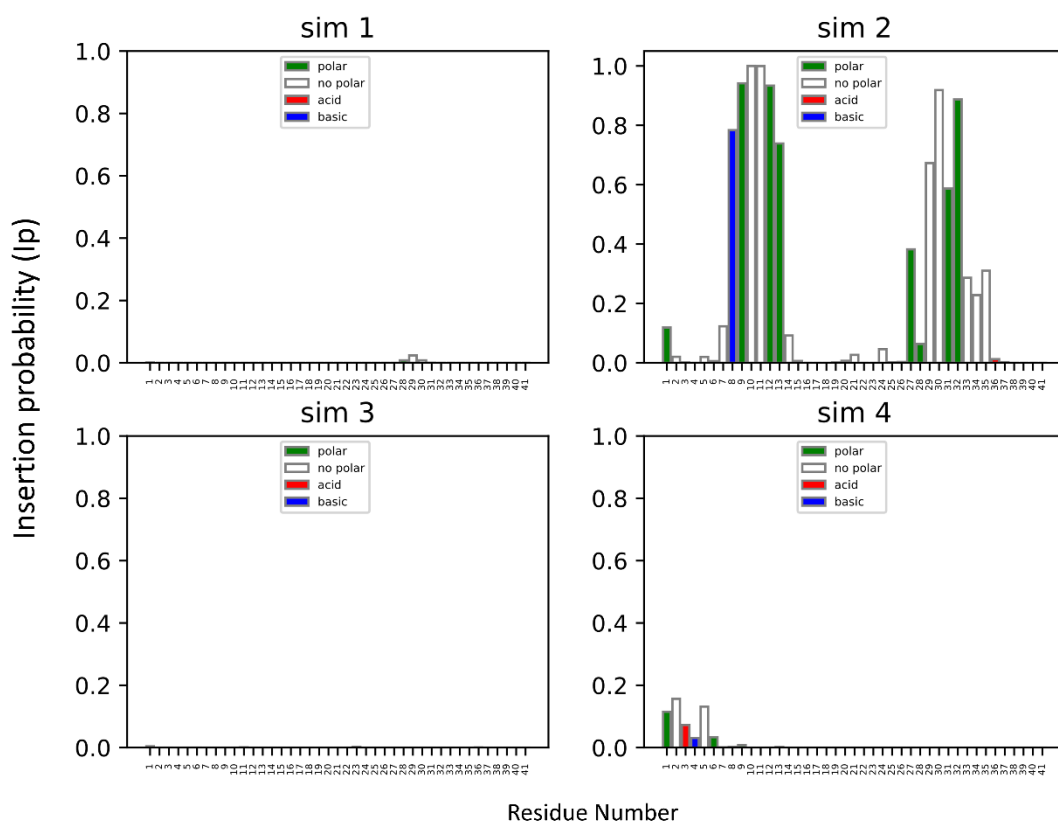

**Figure S7.** Insertions probability for each all-atom simulation of SNX-482 in pure POPC.

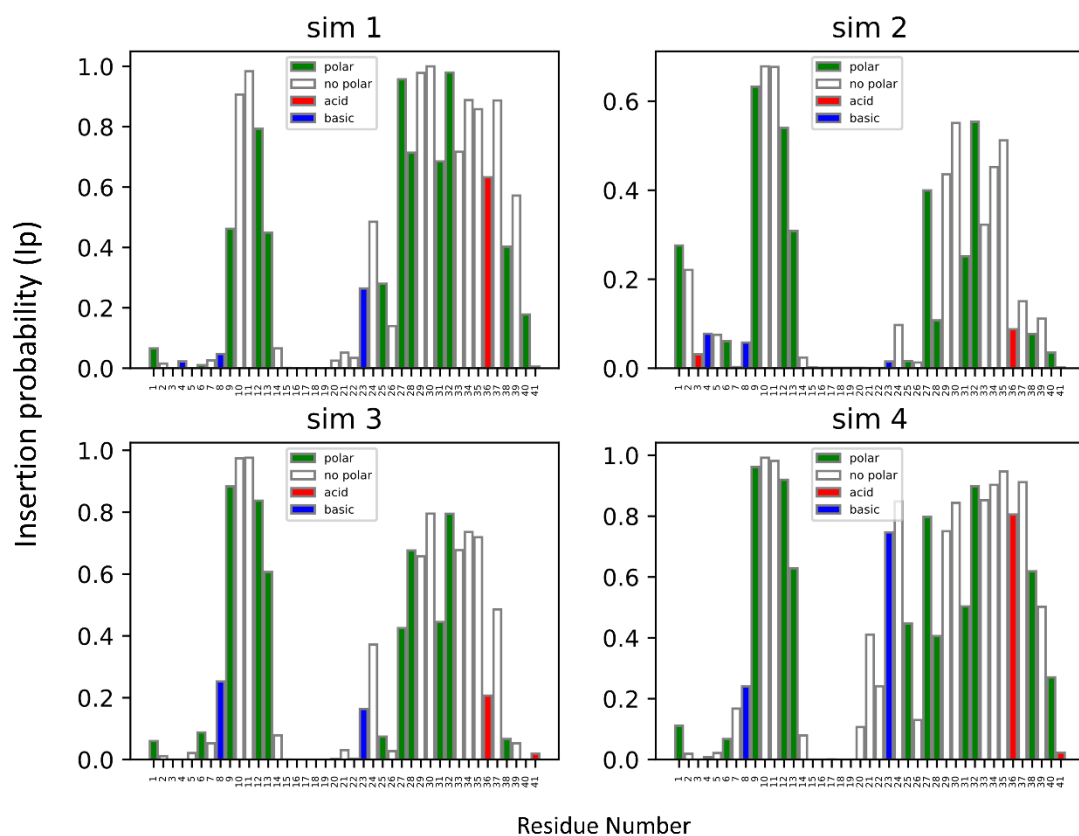

**Figure S8.** Insertions probability for each all-atom simulation of SNX-482 in POPC: POPG (3:1).

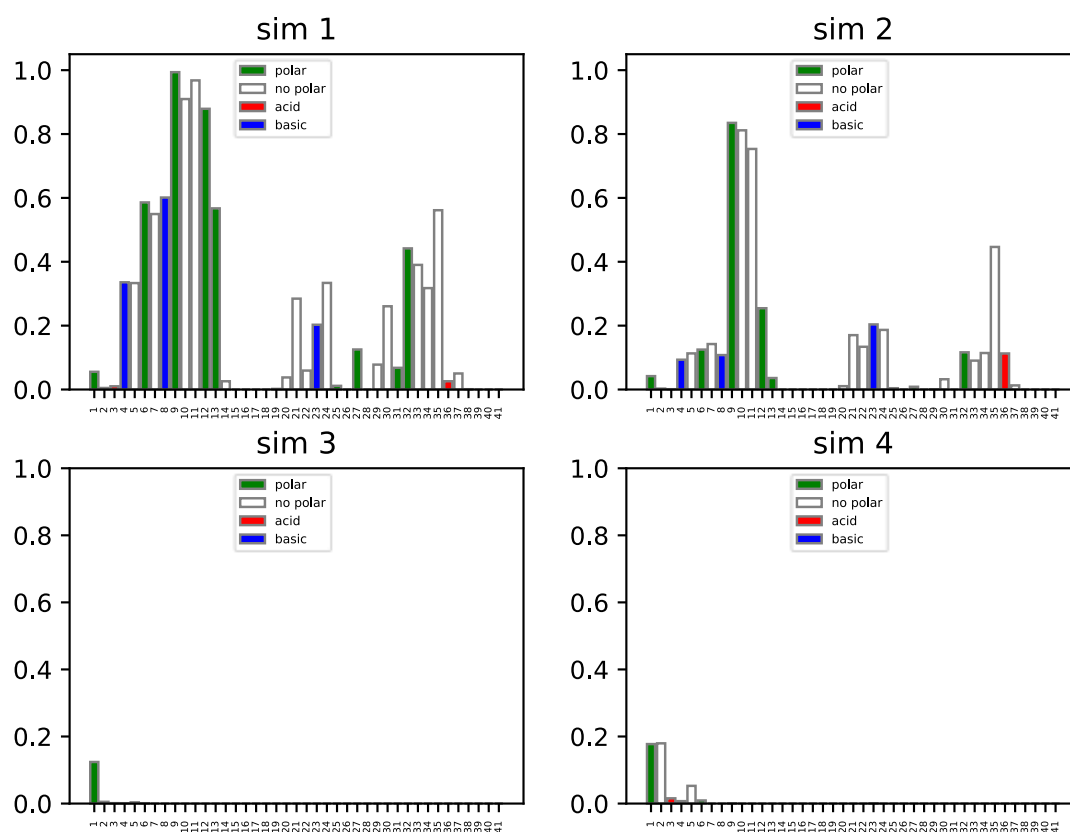

**Figure S9.** Insertions probability for each all-atom simulation of SNX-482 in POPC: POPG (1:1)

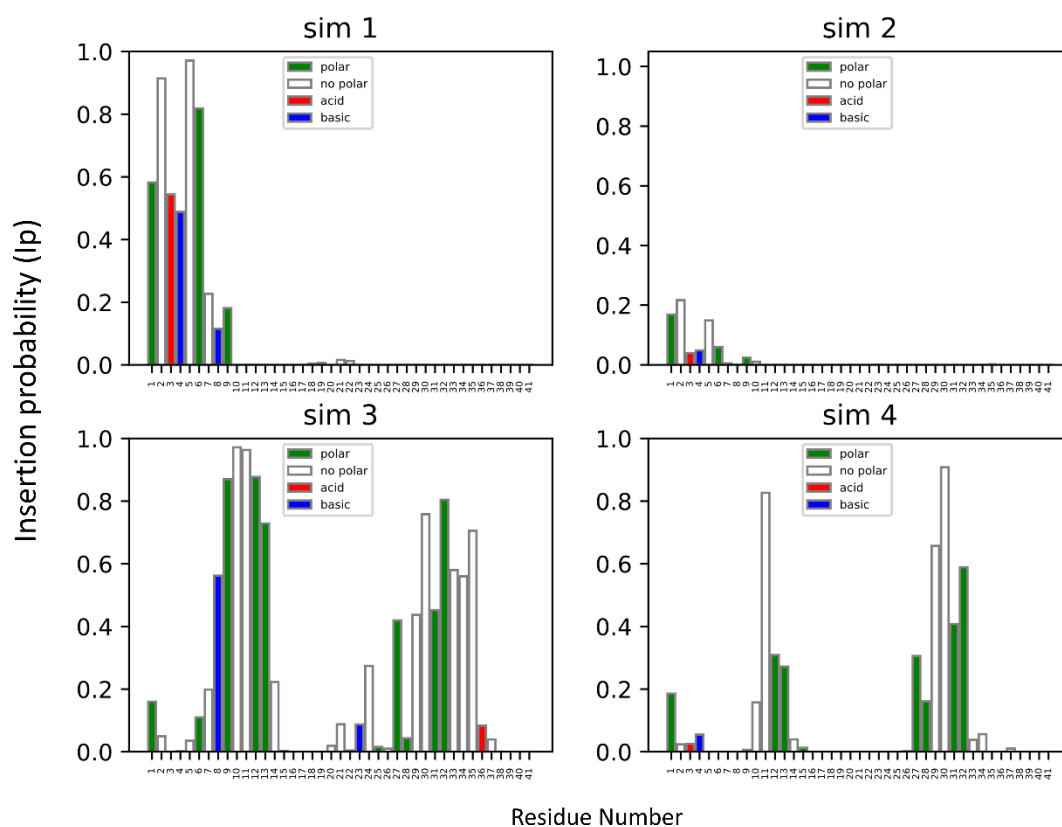

**Figure S10.** Insertions probability for each all-atom simulation of SNX-482 in POPC: POPG (1:3)

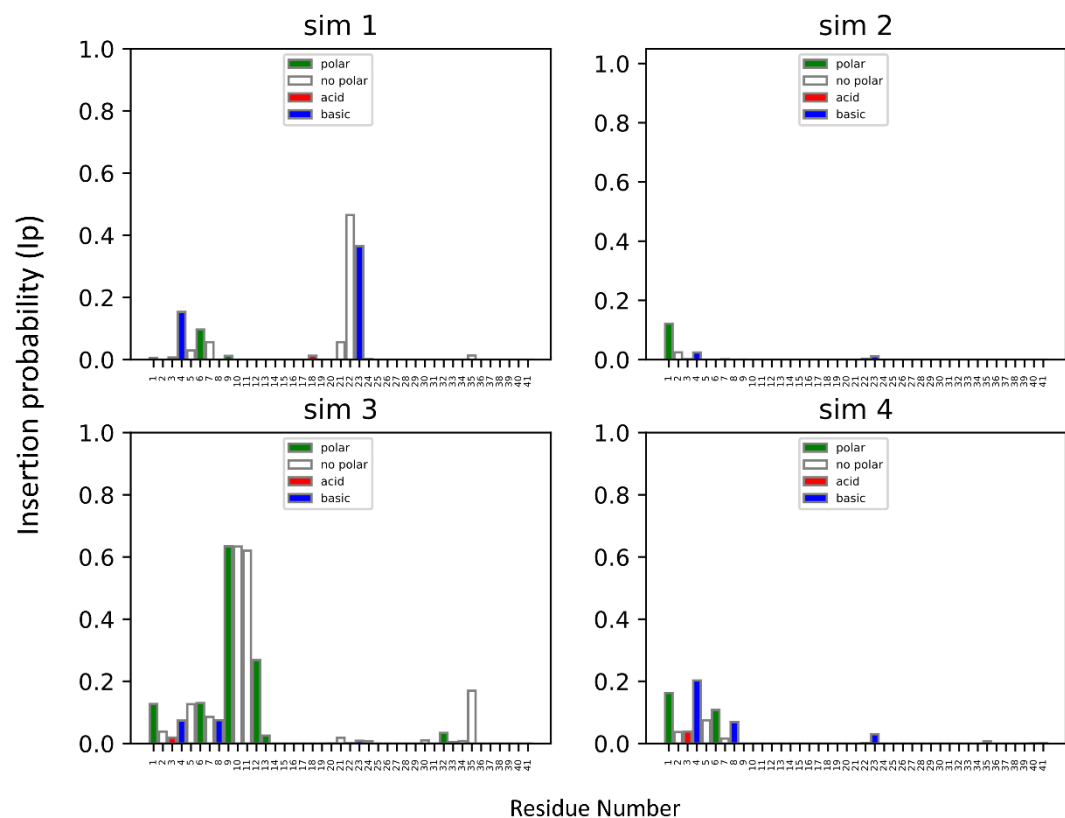

**Figure S11.** Insertions probability for each all-atom simulation of SNX-482 in POPG

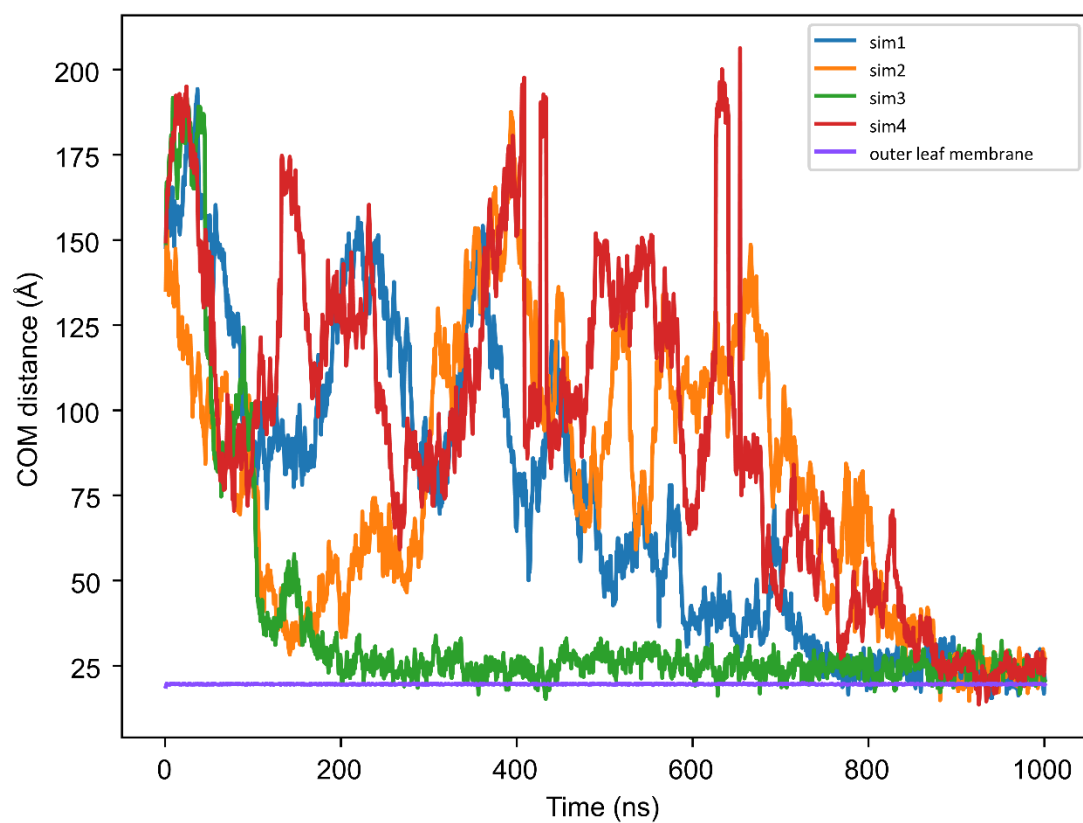

**Figure S12.** COM distance between toxin and POPC: POPG (1:1) membrane in CG simulations. The purple line is the distance from the center of mass of the membrane to the outer leaf membrane.

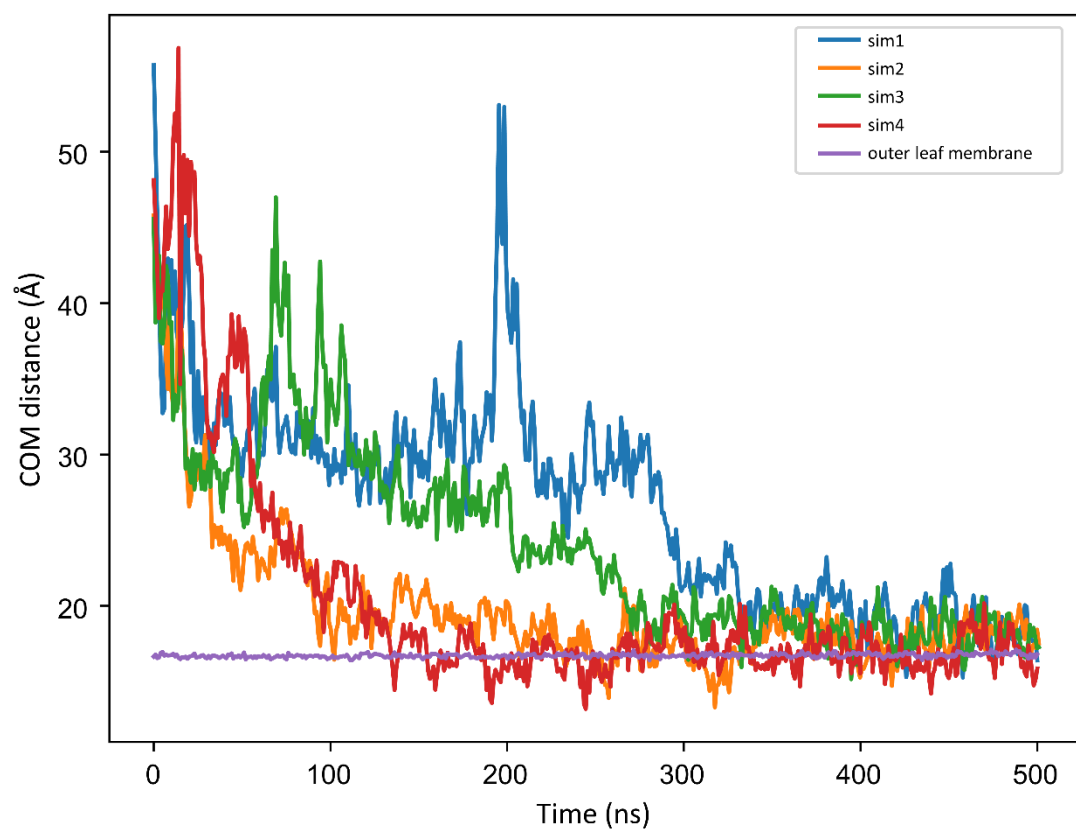

**Figure S13.** COM distance between toxin and POPC: POPG (3:1) membrane in AT simulations. The purple line is the distance from the center of mass of the membrane to the outer leaf membrane.



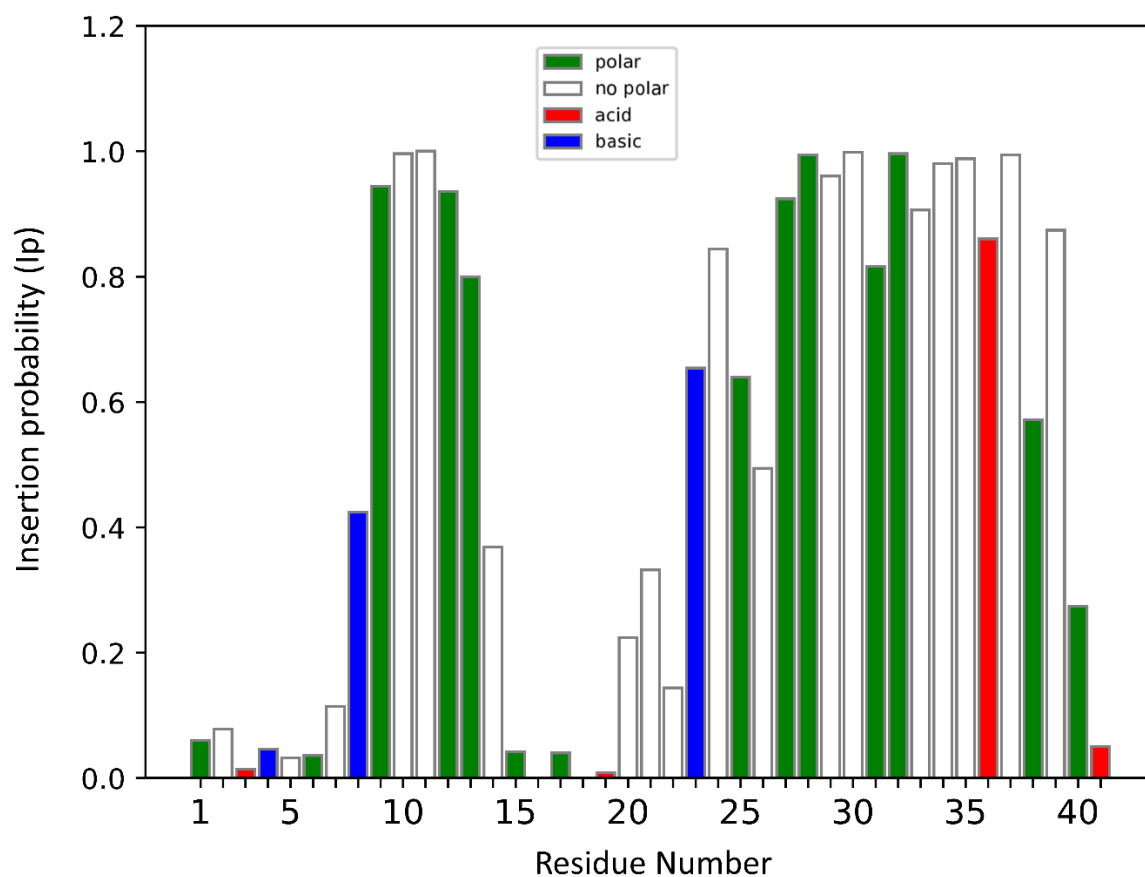

**Figure S14.** Insertions probability computed in the last 0.5  $\mu$ s of AT simulation (1.5  $\mu$ s -2  $\mu$ s) of SNX-482 and POPC: POPG (3: 1).

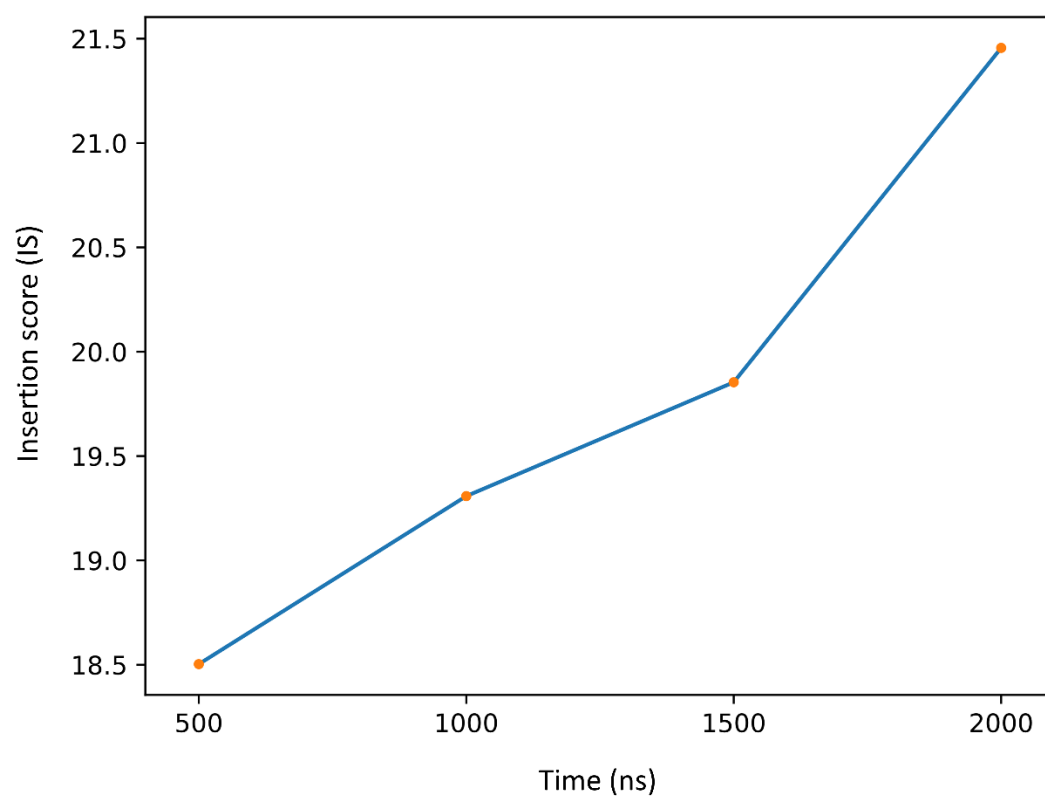

**Figure S15.** Insertions score computed for every 0.5  $\mu$ s of SNX-482 in POPC: POPG (3: 1). during 2  $\mu$ s AT simulation..

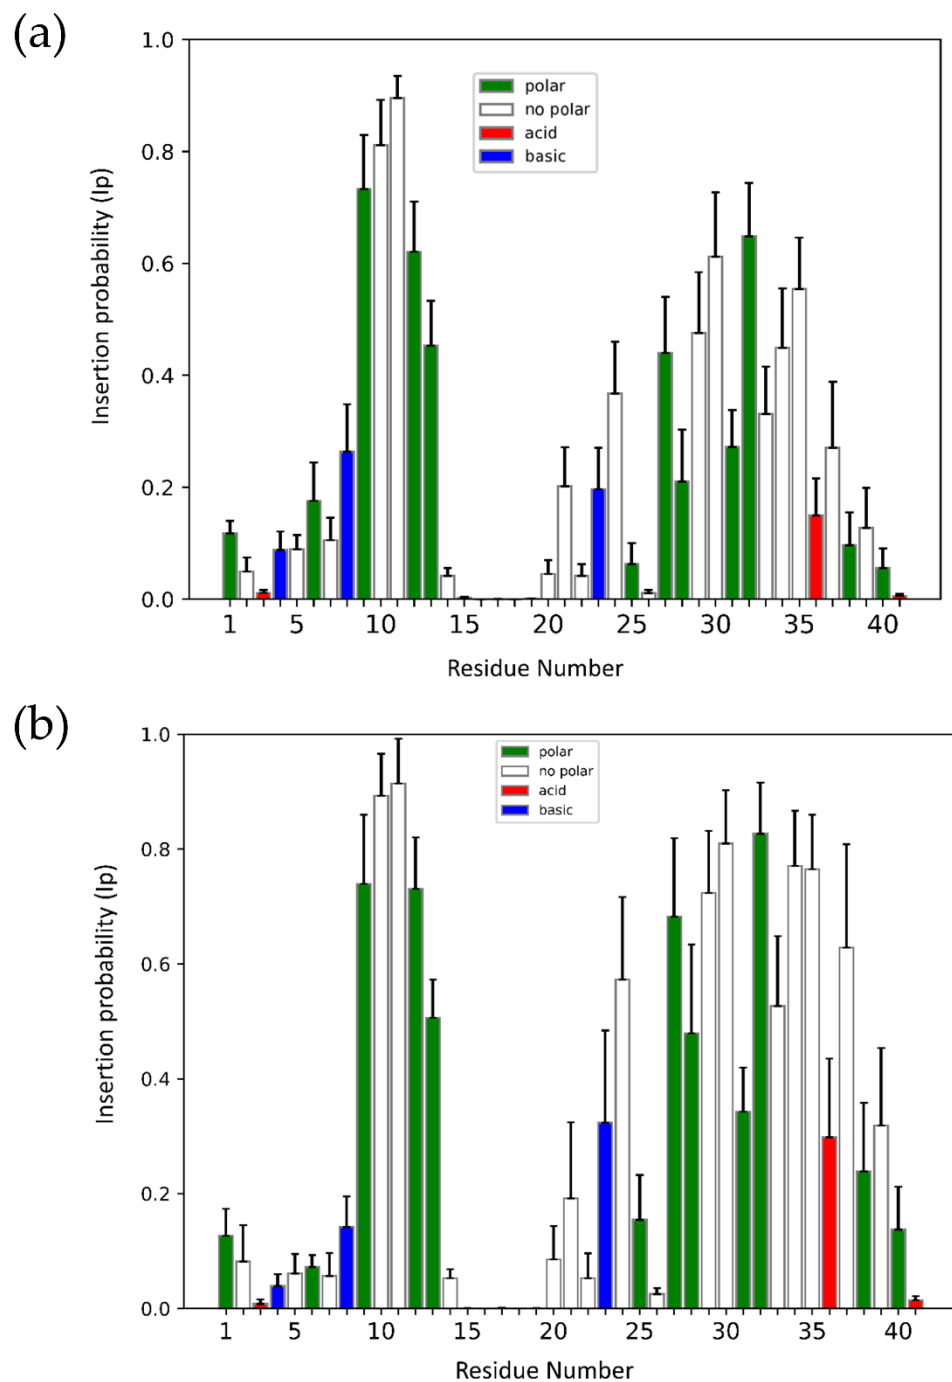

**Figure S16.** Sidechain insertion probability computed **(A)** a for all AT simulations showing toxin insertion (n=10) or **(B)** for all MD on POPC: POPG (3: 1) membrane.

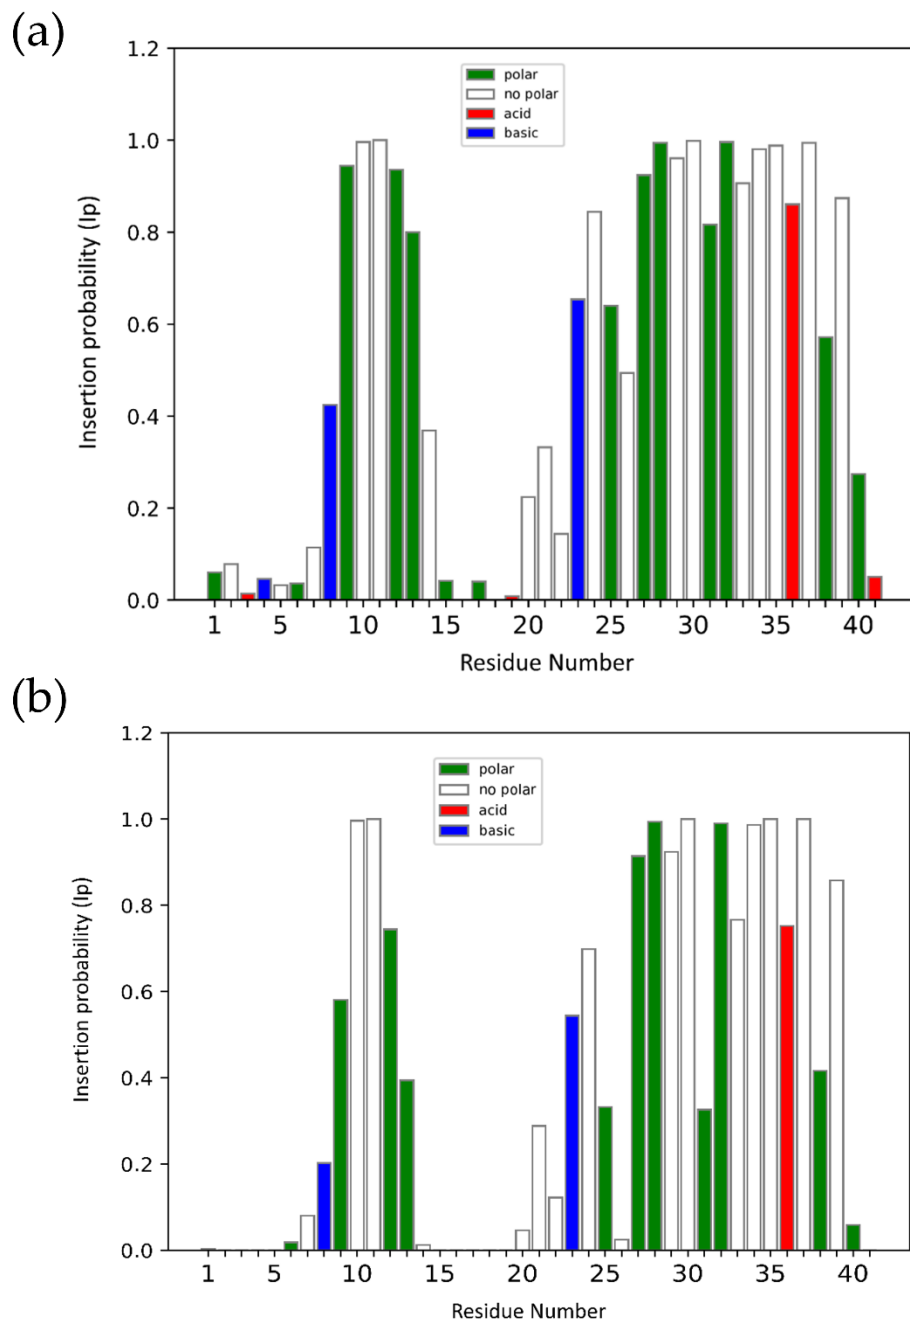

**Figure S17.** Insertions probability computed in the last 0.5  $\mu$ s of AT simulation (1.5  $\mu$ s -2  $\mu$ s) of SNX-482 and POPC: POPG (3: 1) long simulation. **A)** Ip, when residues that fall below the phospholipid's head are shown in A. **B)** Ip considering residues laid below the first carbon of the fatty acid chain.

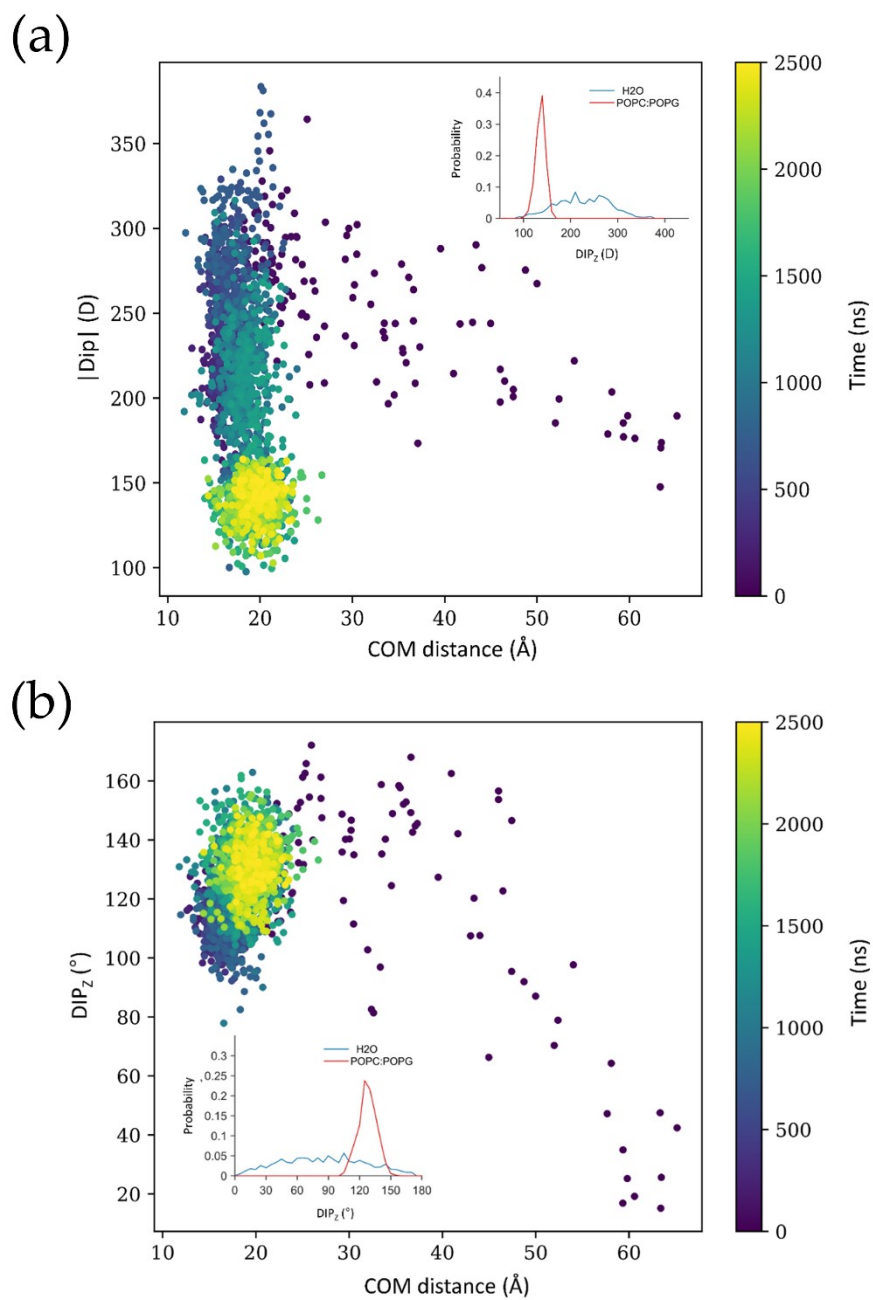

**Figure S18.** Dipole magnitude (A) and angle (B) of SNX-482 in POPC: POPG (3:1) during 2.5  $\mu$  AT simulation as a function of COM distance between the membrane and the toxin. Each point is colored according to the simulation time.

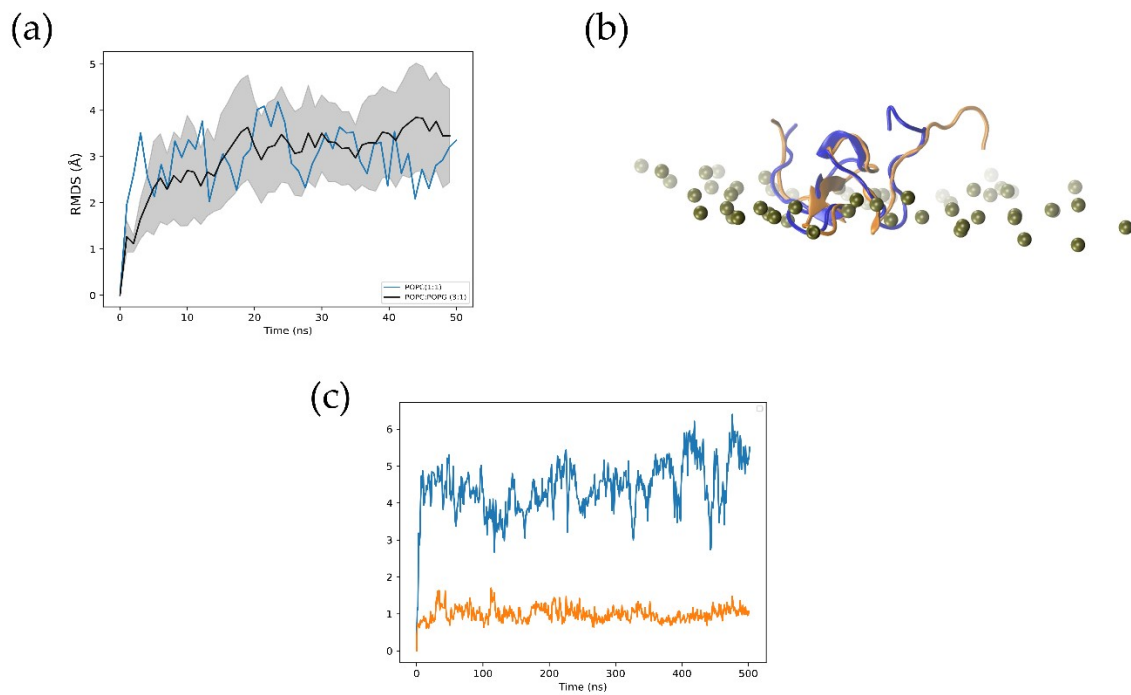

**Figure S19. A)** SNX-482  $\alpha$ -carbon RMSD during the final 0.5  $\mu$ s of the 2  $\mu$ s AT simulation of 3:1 system (toxin-bound, orange line) and the toxin in solution (blue line). **B)** Aligned representative structures of the membrane-bound toxin for the 3:1 (orange) and 1:0 system (blue).  $\alpha$ -carbon RMSD of inserted residues (9-14 and 30-34) is 1.5. **C)** RMSD of 1:0 (blue;  $n=1$ ) and 3:1 system (black;  $n=4$ ). Standard deviation for system 3:1 is shown as a shaded area.

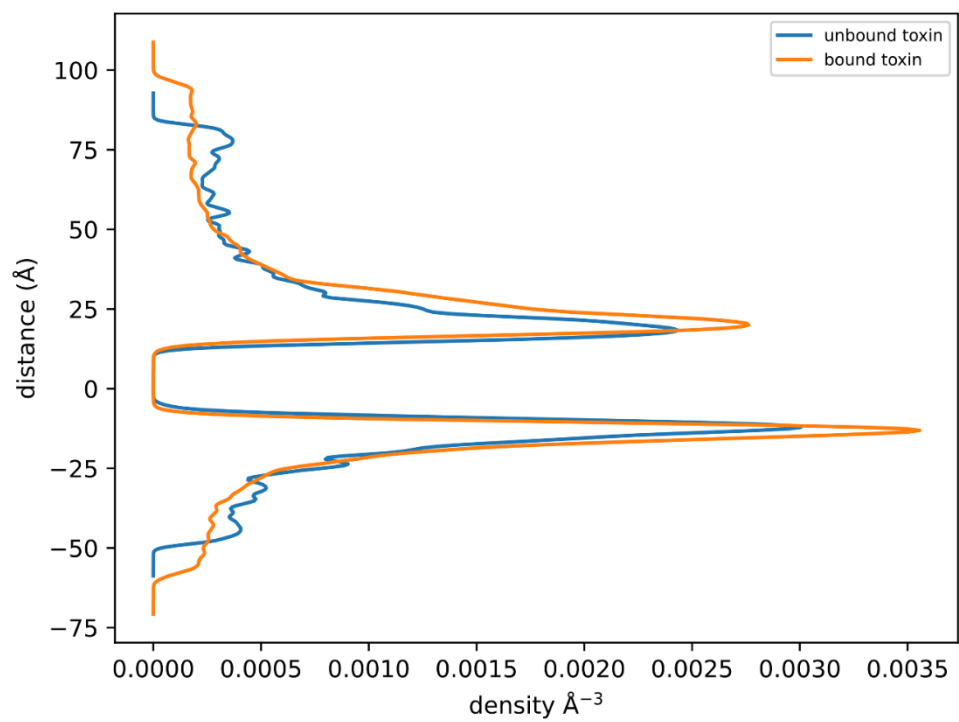

**Figure S20.** Ion number densities along the  $z$  for the 3:1 system for the bound (blue) and unbound states.

(a)

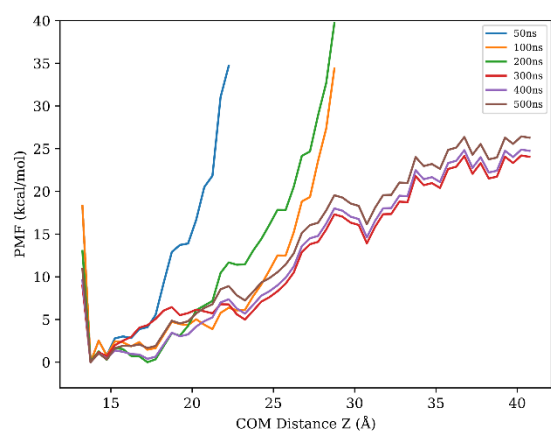

(b)

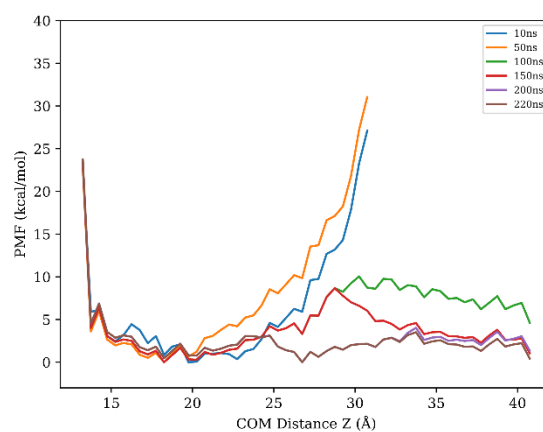

**Figure S21.** PMF profiles at different calculation times for 3:1 (a) and 1:0 (b) systems.
